# Supplementary material for: pH/ROS-responsive propelled nanomotors for the active treatment of renal injury
Source: Royal Society of Chemistry journal article supplement (doi:10.1039/d3nr00062a), 2023-01-01
Supplement: d3nr00062a1.pdf [file d3nr00062a1.pdf]

**Article**

**pH/ROS-Responsive-Propelled Nanomotors for Active Treatment of Renal Injury**

Fei Tong,<sup>a,bcd,‡,\*</sup> Jin Liu<sup>e,‡</sup>, Lei Luo<sup>f,‡</sup>, Lingyan Qiao<sup>g,‡</sup>, Jianming Wu,<sup>a,b</sup> Guosheng Wu<sup>c,\*</sup> and

Qibing Mei<sup>a,b,\*</sup>

<sup>a</sup>Education Ministry Key Laboratory of Medical Electrophysiology, Sichuan Key Medical Laboratory of New Drug Discovery and Druggability Evaluation, Luzhou, China

<sup>b</sup>Key Laboratory of Activity Screening and Druggability Evaluation for Chinese Materia Medica, School of Pharmacy, Southwest Medical University, Luzhou, 646000, China, [qbmei53@hotmail.com](mailto:qbmei53@hotmail.com), [tongxuchang@163.com](mailto:tongxuchang@163.com), [jianmingwu@swmu.edu.cn](mailto:jianmingwu@swmu.edu.cn)

<sup>c</sup>School of Medicine, Zhejiang University, Hangzhou 310003, Zhejiang Province, China, [guosheng\\_wu@zju.edu.cn](mailto:guosheng_wu@zju.edu.cn)

<sup>d</sup>Department of Pharmacology, School of Pharmacy, Binzhou Medical University, Yantai, 264003, PR China, [tongxuchang@163.com](mailto:tongxuchang@163.com)

<sup>e</sup>Key Laboratory of Tropical Biological Resources of Ministry of Education and One Health Institute, School of Pharmaceutical Sciences, Hainan University, Haikou 570228, China, [liujin9108@163.com](mailto:liujin9108@163.com)

<sup>f</sup>Institute of Molecular Medicine (IMM), Renji Hospital, School of Medicine, Shanghai Jiao Tong University, Shanghai 200240, China, [15917917574@163.com](mailto:15917917574@163.com)

<sup>g</sup>The First Clinical medical College, Binzhou Medical University, Yantai, 264003, PR China, [joann\\_1029@163.com](mailto:joann_1029@163.com)

<sup>‡</sup>These authors contributed equally to this work.

## Supplementary information

### pH/ROS-Responsive-Propelled Nanomotors for Active Treatment of Renal Injury

Fei Tong,<sup>a,bcd,‡,\*</sup> Jin Liu<sup>e,‡</sup>, Lei Luo<sup>f,‡</sup>, Lingyan Qiao<sup>g,‡</sup>, Jianming Wu,<sup>a,b</sup> Guosheng Wu<sup>c,\*</sup> and

Qibing Mei<sup>a,b,\*</sup>

<sup>a</sup>Education Ministry Key Laboratory of Medical Electrophysiology, Sichuan Key Medical Laboratory of New Drug Discovery and Druggability Evaluation, Luzhou, China

<sup>b</sup>Key Laboratory of Activity Screening and Druggability Evaluation for Chinese Materia Medica, School of Pharmacy, Southwest Medical University, Luzhou, 646000, China, [qbmei53@hotmail.com](mailto:qbmei53@hotmail.com), [tongxuchang@163.com](mailto:tongxuchang@163.com), [jianmingwu@swmu.edu.cn](mailto:jianmingwu@swmu.edu.cn)

<sup>c</sup>School of Medicine, Zhejiang University, Hangzhou 310003, Zhejiang Province, China, [guosheng\\_wu@zju.edu.cn](mailto:guosheng_wu@zju.edu.cn)

<sup>d</sup>Department of Pharmacology, School of Pharmacy, Binzhou Medical University, Yantai, 264003, PR China, [tongxuchang@163.com](mailto:tongxuchang@163.com)

<sup>e</sup>Key Laboratory of Tropical Biological Resources of Ministry of Education and One Health Institute, School of Pharmaceutical Sciences, Hainan University, Haikou 570228, China, [liujin9108@163.com](mailto:liujin9108@163.com)

<sup>f</sup>Institute of Molecular Medicine (IMM), Renji Hospital, School of Medicine, Shanghai Jiao Tong University, Shanghai 200240, China, [15917917574@163.com](mailto:15917917574@163.com)

<sup>g</sup>The First Clinical medical College, Binzhou Medical University, Yantai, 264003, PR China, [joann\\_1029@163.com](mailto:joann_1029@163.com)

<sup>‡</sup>These authors contributed equally to this work.
